# Supplementary material
Source: PubMed Central journal article supplement (PMC3754720)
Supplement: AEM.00998-13_zam999104583so1.pdf [file AEM.00998-13_zam999104583so1.pdf]

1 **Supplemental Data**

2  
3 **RNA-Seq analysis of the effects of metal nanoparticle exposure on the**  
4 **transcriptome of *Chlamydomonas reinhardtii***

5  
6 Dana F. Simon<sup>a</sup>, Rute F. Domingos<sup>b</sup>, Charles Hauser<sup>c</sup>, Colin M. Hutchins<sup>a</sup>, William  
7 Zerges<sup>d,\*</sup>, Kevin J. Wilkinson<sup>a,\*</sup>

8  
9 <sup>a</sup> Département de chimie, Université de Montréal, P.O. Box 6128, Succursale Centre-  
10 ville, Montréal (QC), Canada H3C 3J7

11 <sup>b</sup> Centro de Química Estrutural, Instituto Superior Técnico/Universidade Técnica de  
12 Lisboa, Torre Sul 11º piso lab 11-6.3, Av. Rovisco Pais # 1, 1049-001 Lisbon, Portugal

13 <sup>c</sup> Bioinformatics Program, St. Edwards's University 3001 South Congress Avenue  
14 Austin, Texas 78704

15 <sup>d</sup> Biology Department and Centre for Structural and Functional Genomics, Concordia  
16 University, 7141 Sherbrooke W., H4B 1R6, Montreal, Canada

17  
18  
19 \* Corresponding author:

20 Kevin Wilkinson: E-mail: [kj.wilkinson@umontreal.ca](mailto:kj.wilkinson@umontreal.ca)

21 William Zerges: E-mail: [william.zerges@concordia.ca](mailto:william.zerges@concordia.ca)

22

23

24

25

## 26 **ADDITIONAL INFORMATION ON PARTICLE SIZE DETERMINATION**

### 27 **METHODS**

28 **Analytical ultracentrifugation (AUC).** Sedimentation velocity experiments were  
29 performed in an OPTIMA XL-I analytical ultracentrifuge (Beckman Coulter) at 20°C.  
30 Interference detection optics (wavelength 675 nm) were used for the nTiO<sub>2</sub> and nZnO,  
31 while absorbance (wavelength 420 nm) and fluorescence (wavelength 488 nm) were  
32 used for nAg, and QD, respectively. A rotational speed of ranging between 35000 and  
33 50000 rotations per minute were employed, depending on the NP sample and 300 scans  
34 were taken. NP concentrations ranging from 5 to 46 mg L<sup>-1</sup> were employed, depending  
35 upon the NP composition and AUC detector. The sedimentation velocity data obtained  
36 from the analytical ultracentrifuge were analyzed using the Sedfitdata analysis program  
37 (1). Particle densities of 3.9 (TiO<sub>2</sub>), 5.6 (ZnO), 10.5 (Ag) and 2 (QD) kg m<sup>-3</sup> were  
38 employed in order to obtain particle size distributions from the experimentally  
39 determined sedimentation coefficients.

40

41 **Fluorescence correlation spectroscopy (FCS).** A Leica TCS SP5 laser scanning  
42 microscope was employed, which makes use of an argon ion laser for fluorescence  
43 excitation (488 nm) and an avalanche photodiode detector for fluorescence intensity  
44 fluctuation determinations. Diffusion times of unknown components were measured and  
45 interpreted based upon an instrument defined autocorrelation function. Diffusion  
46 coefficients were determined by calibrating the size and the shape of the confocal  
47 volume with R110, which has a known  $D$  of  $4.4 \times 10^{-10} \text{ m}^2 \text{ s}^{-1}$  (2). The diffusion times of  
48 1 mg L<sup>-1</sup> of nTiO<sub>2</sub> and nZnO were determined under the same conditions as in the  
49 exposure solutions by labeling the particles with a small quantity ( $1 \times 10^{-8} \text{ M}$ ) of R6G,  
50 which has a known  $D$  of  $4.0 \times 10^{-10} \text{ m}^2 \text{ s}^{-1}$  (2). The raw data was interpreted using ISS

51 Vista FCS software (version 3.6 RC Build 3637). Hydrodynamic diameters,  $d_H$ , of the  
52 nTiO<sub>2</sub> and nZnO (or their aggregates) have been calculated using the Stokes-Einstein  
53 equation:

$$54 \quad d_h = \frac{kT}{3\pi\eta D} \quad \text{(Equation S1)}$$

55 where  $k$  is the Boltzmann constant,  $T$  is the absolute temperature, and  $\eta$  is the solution  
56 viscosity.

57

58 **Atomic force microscopy (AFM).** An AFM Digital Instruments extended, Dimension  
59 3100NanoscopeIIIa was used to quantify NP diameters from a 0.125 mg L<sup>-1</sup> dispersion  
60 of the QD in the exposure media. Two different methods were used to attach the QD to  
61 freshly cleaved muscovite mica sheets: (i) the adsorption method, where mica sheets  
62 were suspended for 20 min. in the dispersion containing the QD, followed by their  
63 gentle immersion in deionized water, and (ii) the drop deposition technique, where 5  $\mu$ L  
64 of the QD sample was pipetted onto freshly cleaved mica and then allowed to dry  
65 overnight in an enclosed Petri dish. Size distribution histograms were based upon the  
66 height measurements of at least 20 AFM images taken from different areas of the mica.

67

68

69

70

71

72

73

74

75

76 **References**

- 77 1. **Schuck P.** 2000. Size-distribution analysis of macromolecules by sedimentation  
78 velocity ultracentrifugation and lamm equation modeling. *Biophys. J.* **78**:1606-  
79 1619.
- 80 2. **Gendron P-O, Avaltroni F, Wilkinson KJ.** 2008. Diffusion Coefficients of  
81 Several Rhodamine Derivatives as Determined by Pulsed Field Gradient-  
82 Nuclear Magnetic Resonance and Fluorescence Correlation Spectroscopy. *J. of*  
83 *Fluorescence* **18**:1093-1101.

84  
85  
86  
87

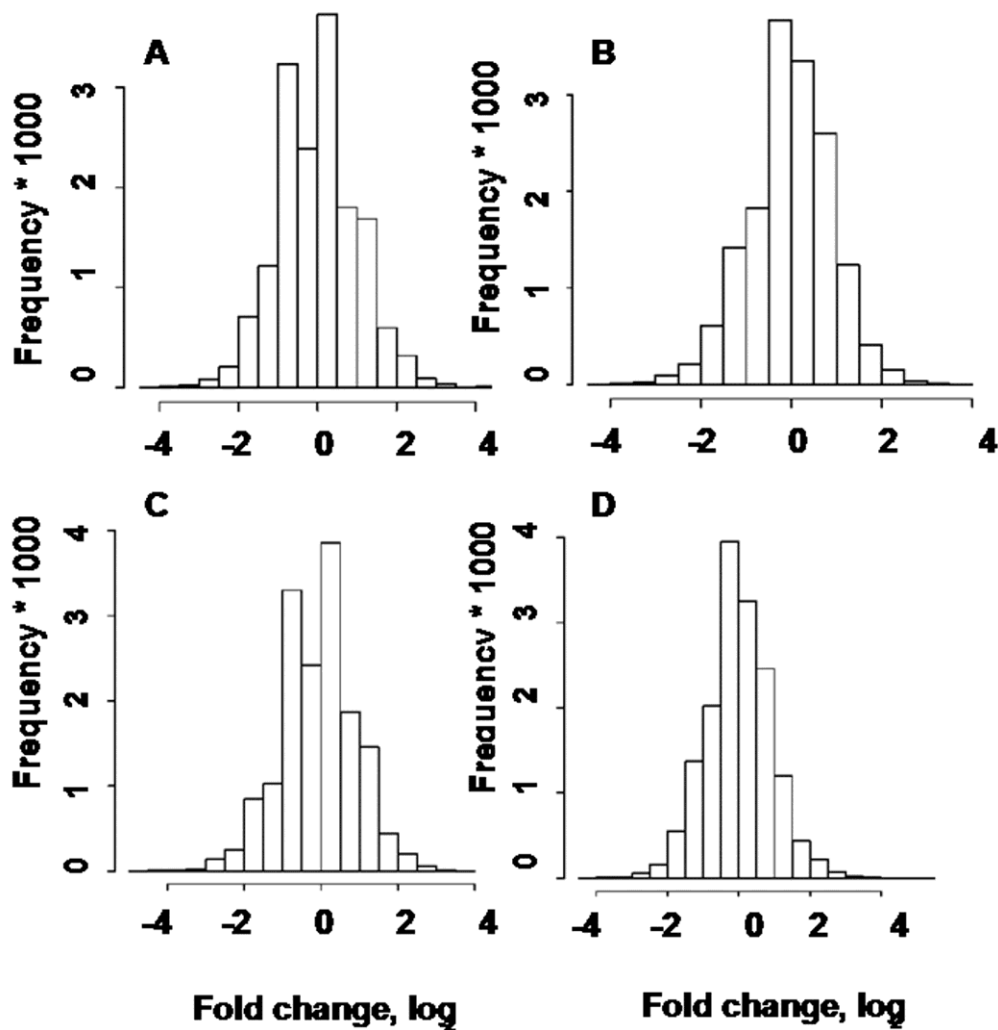

88  
89

90 **Figure S1** – Histograms of fold changes in gene expression for the four NPs; A) – nAg;  
91 B) – QD; C) – nTiO<sub>2</sub>; D) – nZnO. The distribution of the number of genes (frequency)  
92 as a function of (log<sub>2</sub>) fold change.

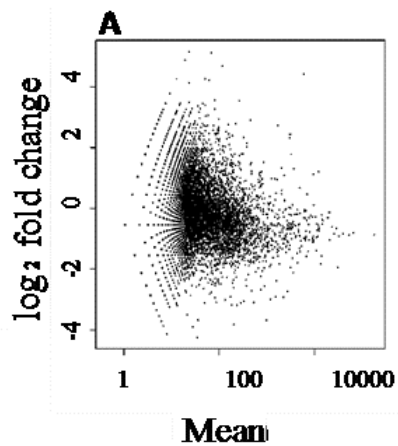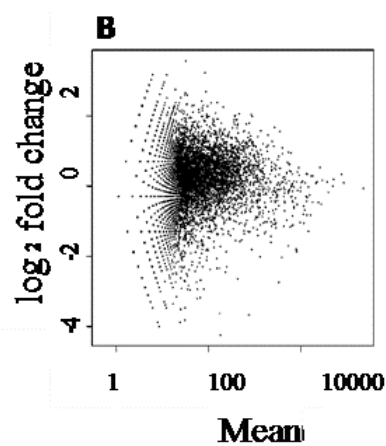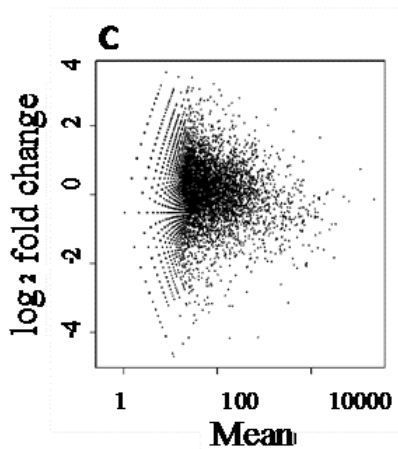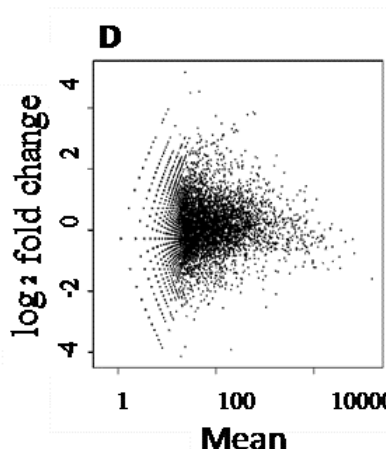

93

94

95 **Figure S2** – Scatterplot of fold change as a function of mean for each NP; A) – nAg ;

96 B) – QD; C) – nTiO<sub>2</sub> ; D) – nZnO.

97

98

PROTEASOME

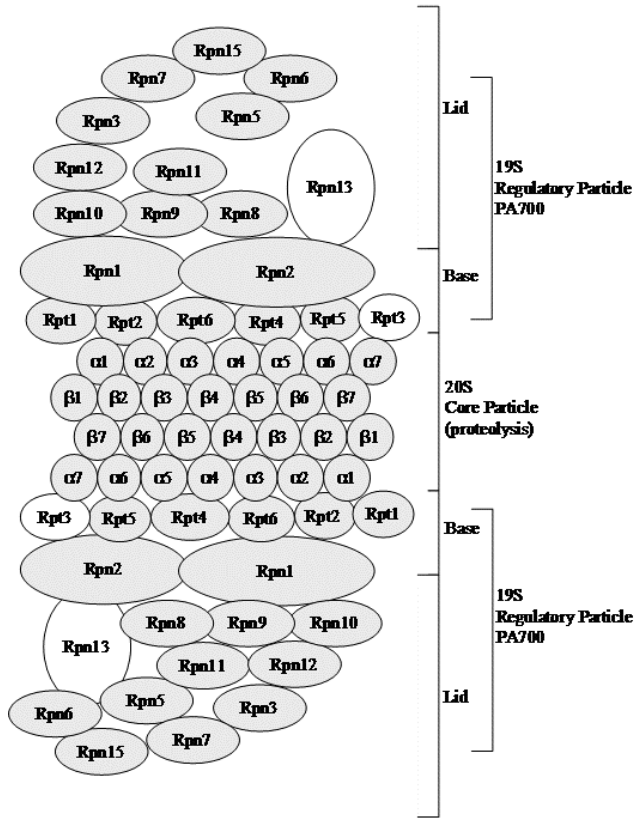

Regulatory particle

PA700 (Lid)

|      |      |       |       |       |
|------|------|-------|-------|-------|
| Rpn3 | Rpn5 | Rpn6  | Rpn7  |       |
| Rpn8 | Rpn9 | Rpn11 | Rpn12 | Rpn15 |

|       |
|-------|
| Rpn10 |
|-------|

PA700 (Base)

|      |      |       |      |      |      |
|------|------|-------|------|------|------|
| Rpn1 | Rpn2 | Rpn13 |      |      |      |
| Rpt1 | Rpt2 | Rpt6  | Rpt4 | Rpt5 | Rpt3 |

Standard proteasome subunit

|            |            |            |            |            |            |            |
|------------|------------|------------|------------|------------|------------|------------|
| $\alpha$ 1 | $\alpha$ 2 | $\alpha$ 3 | $\alpha$ 4 | $\alpha$ 5 | $\alpha$ 6 | $\alpha$ 7 |
| $\beta$ 1  | $\beta$ 2  | $\beta$ 3  | $\beta$ 4  | $\beta$ 5  | $\beta$ 6  | $\beta$ 7  |

99

100

101 **Figure S3** – Proteasome subunit-encoding transcripts elevated by exposure to NPs.

102 Transcripts elevated following exposure to QD, nZnO, or nTiO<sub>2</sub> are highlighted in grey.
